# Supplementary material
Source: Research Square preprint supplement (doi:10.21203/rs.3.rs-6049325/v3)
Supplement: Supplementary file 1 [file 576c410537faa04ebe109536.pdf]

# **Supporting Information for**

## **Thermodynamic coupling between cold and heat**

### **activations of TRPV2**

Guangyu Wang 1, 2\*

<sup>1</sup>Department of Physiology and Membrane Biology, University of California School of  
Medicine, Davis, CA, USA

<sup>2</sup>Department of Drug Research and Development, Institute of Biophysical Medico-chemistry,  
Reno, NV, USA

\* Correspondence: [gary.wang10@gmail.com](mailto:gary.wang10@gmail.com)

This supplementary material includes:

Tables S1, S2, S3, S4, S5, S6 and S7.

**Table S1. Tertiary noncovalent interactions along the PE-dependent minimal gating pathway from V254 to P726 in each subunit of PE-bound closed state 1 of rTRPV2 in DMNG/MSP2N2 at pH8 and 4 °C (PDB ID, 8EKP).**

| <b>Noncovalent interaction</b>         | <b>Cut-off distance</b>         | <b>Linked residues</b>                                                                                                                                                                                                                                                                                                                                                                                                                                                                                                                                                                                 |
|----------------------------------------|---------------------------------|--------------------------------------------------------------------------------------------------------------------------------------------------------------------------------------------------------------------------------------------------------------------------------------------------------------------------------------------------------------------------------------------------------------------------------------------------------------------------------------------------------------------------------------------------------------------------------------------------------|
| Salt bridge                            | 3.2-4 Å                         | D344-R702, E358-R459, K385-E672, K531-D654, R535-E536-R539, R535-E647, E614-R619                                                                                                                                                                                                                                                                                                                                                                                                                                                                                                                       |
| H-bond                                 | <3.9 Å<br>donor-H-acceptor <60° | V254/A257-K307, I256-N263, D258-S260/N263, Y271-E288-R317, D272-H313, N292-L296, K300-N354, A303/K304-C364, G306-N368, E309-R312, Q316-E376, R317-L326/R328, E318-T331, Q324-S327, P325/S327-R702, R328-S346, E332-R706, D344-S346, S347-V356, D349/S350-K385, D349-E685, S350-E672, S366-N368, R369-D469, H370-S658, Q383-D387, R388-E685, N396-Y675, Y400-Q479/N511, T408-W559, Y447-W677, R458-E670, S466-S470, L475-N511, Q479-S504, Q487-R490, Y471-PE-R517-PE-Q530-PE-Q663-PE-R517, R517-W660, M528-K531, R535-R539, E561-R617, E599-K602, L600-Y629, D654-S656, N655-S658, K690-G692, R702-D700 |
| $\pi$ - $\pi$ interaction              | 2.65–6.5 Å                      | F362-F462, W386-F393-Y515, F394-F519, F397-Y515, Y400-Y403-Y407, Y400-F476, Y400-Y515, Y447-Y675/W676, W454-W676, Y455-F456/F462, Y471-F472-Y514, F476-Y514/Y515, Y514-Y515, F540-Y544, Y544-F601, F551-Y629-F603, W676-W677, W712-W715                                                                                                                                                                                                                                                                                                                                                                |
| cation- $\pi$ interaction              | <6.0 Å                          | W351-R684-W703, W386-K664, H438-R490, W454-R458, W457-R460                                                                                                                                                                                                                                                                                                                                                                                                                                                                                                                                             |
| CH <sub>3</sub> /CH- $\pi$ interaction | 2.65-3.01 Å                     | I268-H313, Q276-Y323, F311-L315, F330-V691, P337-W712, H370-I659, L381-F705, L450-W676, F476-N511, R490-Y497, Q520-W660, Y525-I529, F540-M640, F547-L636, F549-V553, L555-Y590, F603-V630, W657-K661, W660-K664, L688-W703, W715-L719                                                                                                                                                                                                                                                                                                                                                                  |
| Lone pair- $\pi$ interaction           | 3-3.7 Å                         | Y455-E473, Y629-T633                                                                                                                                                                                                                                                                                                                                                                                                                                                                                                                                                                                   |

**Table S2. Tertiary noncovalent interactions along the PE-dependent minimal gating pathway from V254 to P726 in each subunit of PE-bound closed state 2 of rTRPV2 in DMNG/MSP2N2 at pH8 and 4 °C (PDB ID, 8EKQ).**

| Noncovalent interaction                | Cut-off distance                | Linked residues                                                                                                                                                                                                                                                                                                                                                                                                                                                                                                                                                                                                                                           |
|----------------------------------------|---------------------------------|-----------------------------------------------------------------------------------------------------------------------------------------------------------------------------------------------------------------------------------------------------------------------------------------------------------------------------------------------------------------------------------------------------------------------------------------------------------------------------------------------------------------------------------------------------------------------------------------------------------------------------------------------------------|
| Salt bridge                            | 3.2-4 Å                         | D344-R702, D536-R539                                                                                                                                                                                                                                                                                                                                                                                                                                                                                                                                                                                                                                      |
| H-bond                                 | <3.9 Å<br>donor-H-acceptor <60° | V254/M255/A257-K307, D258-S260/N263, Y271-E288-R317, D272-H313, N292-L296, K300-N354, A303/K304-C364, G306-N368, E309-R312, Q316-E376, R317-L326/S327/R328/K329, E318-T331, Q324-S327/V691, P325/S327-R702, R328-S346, E332-R706, D344-S346, S347-V356, D349/S350-K385, D349-E685, S350-E672, E358-R459, S366-N368-R371, R369-D469, E376-K380-R706, Q383-D387, K385-E672/E685, R388-E685, N396-Y675, Y400-G508, Y403-I441, T408-W559, Q414-H438, Y447-W677, Q452-E473, R458-E670, S466-D469/S470, T516-T522, Y471-PE-R517-PE-Q530-PE-Q663-PE-R517, R517-W660, R535-E536, Y544-Y629, Y590-A611, S592-D595, E599-A611, L600/T604-Y629, N673-K682, R702-D700 |
| $\pi$ - $\pi$ interaction              | 2.65–6.5 Å                      | F362-F462, W386-F393-Y515, F394-F519, F397-Y515, Y400-Y403, Y400-F476, Y400-Y515, Y447-Y675/W676, W454-W676, Y455-F456/F462, Y471-F472-Y514, F476-Y514/Y515, Y514-Y515, Y544-F601, F551-Y629, F603-Y629, W676-W677, W712-W715                                                                                                                                                                                                                                                                                                                                                                                                                             |
| cation- $\pi$ interaction              | <6.0 Å                          | W351-R684-W703, W386-K664, R392-Y675, H438-R490, W454-R458, W457-R460                                                                                                                                                                                                                                                                                                                                                                                                                                                                                                                                                                                     |
| CH <sub>3</sub> /CH- $\pi$ interaction | 2.65-3.01 Å                     | I268-H313, Q276-Y323, F311-L315, L329-Y343, F330-V691, P337-W712, L381-F705, L450-W676, R490-Y497, Q520-W660, V543-F547, F547-L632, F549-V553, L555-Y590, F603-L610, V630-Y634, W657-K661, W660-K664, L688-W703                                                                                                                                                                                                                                                                                                                                                                                                                                           |
| Lone pair- $\pi$ interaction           | 3-3.7 Å                         | Y455-E473, Y629-T633                                                                                                                                                                                                                                                                                                                                                                                                                                                                                                                                                                                                                                      |

**Table S3. Tertiary noncovalent interactions along the PE-dependent minimal gating pathway from V254 to P726 in each subunit of PE-bound closed state 3 of rTRPV2 in DMNG/MSP2N2 at pH8 and 4 °C (PDB ID, 8EKR).**

| Noncovalent interaction                | Cut-off distance                | Linked residues                                                                                                                                                                                                                                                                                                                                                                                                                                                                                              |
|----------------------------------------|---------------------------------|--------------------------------------------------------------------------------------------------------------------------------------------------------------------------------------------------------------------------------------------------------------------------------------------------------------------------------------------------------------------------------------------------------------------------------------------------------------------------------------------------------------|
| Salt bridge                            | 3.2-4 Å                         | E309-R312, D344-R702-D700, E358-R459, R369-D469, R388-E685, D536-R539                                                                                                                                                                                                                                                                                                                                                                                                                                        |
| H-bond                                 | <3.9 Å<br>donor-H-acceptor <60° | A257-K307, N259-N368, <b>Y271-E288-R317</b> , D272-H313, R280-Y323, <b>N292-L296</b> , <b>K300-N354</b> , A303/K304-C364, Q316-E376, <b>R317-L326/S327/R328</b> /K329, F319-S327-Q324, P325/S327-R702, R328-S346-S347/D344, E332-R687, C334-G336, S350-E672, H370-S658, V374-N379, N396-Y675, Y447-W677, R458-E670, S466-D469, Q479-T483, S486-Y497, Y514-R517-W660, T516-T522, Y544-Y629, E561-R617, R563-Q615, S592-D595, E599-K602, E672-R680, T693-T698, R694-P699, R706-E708, N711-A713, T721-S723-D725 |
| $\pi$ - $\pi$ interaction              | 2.65–6.5 Å                      | F362-F462, W386- <b>F393-Y515</b> , F394-F519, F397-Y515, <b>Y400-Y403</b> , Y400-F476, <b>Y400-Y515</b> , Y403-F407, F405-W509, <b>Y412-H413</b> , <b>Y447-Y675/W676</b> , W454-W676, <b>Y455-F456</b> , Y471-F472-Y514, F476-Y514/Y515, <b>Y514-Y515</b> , F540-Y544, Y544-F601, <b>F551-Y629</b> , F603-Y629, W657-W660, W676-W677, W712-W715                                                                                                                                                             |
| cation- $\pi$ interaction              | <6.0 Å                          | W351-R684-W703, W386-K664, H438-R490, W454-R458, W457-R460                                                                                                                                                                                                                                                                                                                                                                                                                                                   |
| CH <sub>3</sub> /CH- $\pi$ interaction | 2.65-3.01 Å                     | I268-H313, Q276-Y323, <b>F311-L315</b> , F330-V691, W333-P726, P337-W712, <b>M404-W509</b> , V410-H438, L450-W676, <b>Y455-R459</b> , F467-Y471, Q520-W660, F540-M640, V543-F547, <b>F549-V553</b> , L555-Y590, L600-Y629, W657-K661, W660-K664, L688-W703                                                                                                                                                                                                                                                   |
| Lone pair- $\pi$ interaction           | 3-3.7 Å                         | F601-T604, Y629-T633                                                                                                                                                                                                                                                                                                                                                                                                                                                                                         |

Note: Bold interactions were conserved in closed state 3 and the open state.

**Table S4. Tertiary noncovalent interactions along the PE-dependent minimal gating pathway from V254 to P726 in each subunit of PE-free activated state 1 of rTRPV2 with C16 bound in GDN at pH8 and 4 °C (PDB ID, 7ZJD).**

| <b>Noncovalent interaction</b>         | <b>Cut-off distance</b>         | <b>Linked residues</b>                                                                                                                                                                                                                                                                                                                                                                                                                                            |
|----------------------------------------|---------------------------------|-------------------------------------------------------------------------------------------------------------------------------------------------------------------------------------------------------------------------------------------------------------------------------------------------------------------------------------------------------------------------------------------------------------------------------------------------------------------|
| Salt bridge                            | 3.2-4 Å                         | E309-R312, D344-R702, E358-R459, R369-D469, E384-K388-E685, R459-E670, R535-D536/E647                                                                                                                                                                                                                                                                                                                                                                             |
| H-bond                                 | <3.9 Å<br>donor-H-acceptor <60° | V254/M255/A257-K307, S260-E262, Y271-E288-R317, D272-H313, N292-L296, K300-N354, A303/K304-C364, R317-L326/R328/K329, E318-T331, P325/S327-R702, S327-K329, E332-R706, S341/Y343-E709, V348-S355, D349-K385, E352-S355, C364-S366/R369, N368-R371, H370-S658, N379-K661, E384-R687, N396-Y675, Y400-N511/Q476, T408-W559, Y447-W677, R458-E670, Q479-N511, S486-Q487, Y514-R517-W660, D536-R539, Y544-Y629, S559-P589, S592-D595, E599-K602, M671-G674, N673-R680 |
| $\pi$ - $\pi$ interaction              | 2.65–6.5 Å                      | F362-F462, W386-F393-Y515, F393-F394, F397-Y515, Y400-Y403, Y400-F476, Y400-Y515, Y412-H413, Y447-W676, W454-W457/W676, Y455-F456, Y471-F472-Y514, F476-Y514/Y515, Y514-Y515, F519-H521, F540-Y544, Y544-F601, F551-Y629, Y590-F612, F603-Y629, W657-W660, W676-W677, W712-W715                                                                                                                                                                                   |
| cation- $\pi$ interaction              | <6.0 Å                          | W386-K664, H438-R490, W454-R458, R539-F540                                                                                                                                                                                                                                                                                                                                                                                                                        |
| CH <sub>3</sub> /CH- $\pi$ interaction | 2.65-3.01 Å                     | I268-H313, Q276-Y323, F311-L315, W333-V340, P337-W712/W715, F395-C399, M404-W509, V410-H438, L450-W676, F476-N511, R490-Y497, F540-M640, F547-L632, L555-F612, L600-Y629, F603-L610, R617-F618, V630-Y634, W657-K661, W660-K664, K690-W703                                                                                                                                                                                                                        |
| Lone pair- $\pi$ interaction           | 3-3.7 Å                         | F319-Q276, W351-E685, Y629-T633                                                                                                                                                                                                                                                                                                                                                                                                                                   |

**Table S5. Tertiary noncovalent interactions along the PE-dependent minimal gating pathway from V254 to P726 in each subunit of PE-free inactivated state 1 of rTRPV2 with C16 bound in GDN at pH8 and 4 °C (PDB ID, 7ZJE).**

| <b>Noncovalent interaction</b>         | <b>Cut-off distance</b>         | <b>Linked residues</b>                                                                                                                                                                                                                                                                                                                                                                                                           |
|----------------------------------------|---------------------------------|----------------------------------------------------------------------------------------------------------------------------------------------------------------------------------------------------------------------------------------------------------------------------------------------------------------------------------------------------------------------------------------------------------------------------------|
| Salt bridge                            | 3.2-4 Å                         | E288-R317, E309-R312, E318-K329, D344-R702, D349-K385, E358-R459                                                                                                                                                                                                                                                                                                                                                                 |
| H-bond                                 | <3.9 Å<br>donor-H-acceptor <60° | V254/M255/A257-K307, D258-S260/N263/S264, D272-H313, G295/K300-N354, A303/K304-C364, G306-N368, R317-S327/R328/K329, Q324-T693, S327-K329, R339-E709, V348-S355, S350-K682, C364-S366, N368-R371, R369-D469, Q383-D387, E384-K388, R392-Y675, N396-Y675, Y400-G508, Y403-I441, Y447-W677, Q452-E473, M468-Q530/K531, S486/Q487-Y497, T516-T522-S526, R517-W660, Q530-K531, Y544-Y629, N673-K682, C678-Y675, H683-E685, R706-E708 |
| $\pi$ - $\pi$ interaction              | 2.65–6.5 Å                      | W333-W715, W351-W703, F362-H363-F462, W386-F393-Y515, F394-F519, F397-Y515, Y400-F476, Y400-Y515, F405-W509, Y412-H413, L434-H438, Y447-W676, W454-W676, Y455-F456, Y471-F472-Y514, F476-Y514, Y514-Y515, F551-Y629, W657-W660, W676-W677, W712-W715                                                                                                                                                                             |
| cation- $\pi$ interaction              | <6.0 Å                          | W386-K664, W454-R458, W457-R460                                                                                                                                                                                                                                                                                                                                                                                                  |
| CH <sub>3</sub> /CH- $\pi$ interaction | 2.65-3.01 Å                     | I268-H313, P322-Y323, P337-W712, Y343-P377, M404-W509, L450-W676, Q520-H521, L600-Y629, F601-I605, R617-F618, W657-K661, W660-K664, R687-W703                                                                                                                                                                                                                                                                                    |
| Lone pair- $\pi$ interaction           | 3-3.7 Å                         | Q276-F319, Y629-T633                                                                                                                                                                                                                                                                                                                                                                                                             |

**Table S6. Tertiary noncovalent interactions along the PE-dependent minimal gating pathway from V254 to P726 in each subunit of PE-free activated state of rTRPV2 with PBC bound in GDN at pH8 and 4 °C (PDB ID, 7ZJG).**

| <b>Noncovalent interaction</b>         | <b>Cut-off distance</b>         | <b>Linked residues</b>                                                                                                                                                                                                                                                                                                                                                                 |
|----------------------------------------|---------------------------------|----------------------------------------------------------------------------------------------------------------------------------------------------------------------------------------------------------------------------------------------------------------------------------------------------------------------------------------------------------------------------------------|
| Salt bridge                            | 3.2-4 Å                         | E288-R317, E309-R312, E358-R459, R458-E670, R706-E708                                                                                                                                                                                                                                                                                                                                  |
| H-bond                                 | <3.9 Å<br>donor-H-acceptor <60° | V254-K307, N259-I308, D272-H313, N292-L296, K300-N354, A303/K304-C364, R317-S327/R328, Q324-S327, R328-D344, K329-Y343, D344-D349, S349-S355/K385, D344-R702-C704, K365-S466/D469, H370-S658, R371-D654, Q383-K661, E384-K388, T408-W509, V409-H413, Q414-Y497, H438-Q487, Q452-E473, D496-K531, R517-W660, Y544-Y629, S599-P589/Y590/R591, E599-K602, W676-R679, W677-R679, C678-R680 |
| $\pi$ - $\pi$ interaction              | 2.65–6.5 Å                      | W351-W703, F362-F462, W386-F393-Y515, F393-F394-F519, F397-Y515, Y400-F476, Y400-Y515, F405-W509, Y412-H413, Y447-Y675/W676, W454-W457/W676, Y455-F456, Y471-F472-Y514, F476-Y514/Y515, Y514-Y515, Y544-F601, F551-Y629, F603-Y629, W657-W660, W676-W677                                                                                                                               |
| cation- $\pi$ interaction              | <6.0 Å                          | W386-K664, R392-Y675, H438-R490                                                                                                                                                                                                                                                                                                                                                        |
| CH <sub>3</sub> /CH- $\pi$ interaction | 2.65-3.01 Å                     | I268-H313, Q276-Y323, P337-W712, M404-W509, V410-H438, F429-S432, W496-P499, Y514-R517, Q520-W660, H521-I524, L600-Y629, W660-K664                                                                                                                                                                                                                                                     |
| Lone pair- $\pi$ interaction           | 3-3.7 Å                         | Y629-T633                                                                                                                                                                                                                                                                                                                                                                              |

**Table S7. Tertiary noncovalent interactions along the PE-dependent minimal gating pathway from V254 to P726 in each subunit of PE-free open rTRPV2 in LMNG at pH8 and 4 °C (PDB ID, 6BO4).**

| <b>Noncovalent interaction</b>         | <b>Cut-off distance</b>         | <b>Linked residues</b>                                                                                                                                                                                                                         |
|----------------------------------------|---------------------------------|------------------------------------------------------------------------------------------------------------------------------------------------------------------------------------------------------------------------------------------------|
| Salt bridge                            | 3.2-4 Å                         | <b>E288-R317</b> , R328-D344-R684-D349                                                                                                                                                                                                         |
| H-bond                                 | <3.9 Å<br>donor-H-acceptor <60° | I256-M263, <b>Y271-E288</b> , <b>N292-L296</b> , T297-L299, <b>K300-N354</b> , E305-K307, <b>R317-L326/S327/R328</b> , S346-S350, E358-R459, E384-R388, K385-E672, Y400-G508, Y403-I441, T408-W509, Y471-L534, Q479-N511, L513-T516, Q578-E584 |
| $\pi$ - $\pi$ interaction              | 2.65–6.5 Å                      | Y271-H313, <b>F393-Y515</b> , F394-F397-Y515, <b>Y400-Y403</b> , <b>Y400-Y515</b> , <b>Y412-H413</b> , <b>Y447-W676</b> , <b>Y455-F456</b> , <b>Y514-Y515</b> , F547- <b>Y629-F551</b> , <b>W657-W600</b>                                      |
| cation- $\pi$ interaction              | <6.0 Å                          | F362-R460, R490-Y497                                                                                                                                                                                                                           |
| CH <sub>3</sub> /CH- $\pi$ interaction | 2.65-3.01 Å                     | Y271-L275, <b>F311-L315</b> , H313-I268, H370-I659, W386-S391, <b>M404-W509</b> , F405-V409, W454-R458, <b>Y455-R459</b> , W496-L500, Q520-H521, I524-W660, Y525-I529, <b>F549-V553</b> , Y629-T633                                            |
| Lone pair- $\pi$ interaction           | 3-3.7 Å                         | Y455-E473, F519-T522                                                                                                                                                                                                                           |

Note: Bold interactions were conserved in closed state 3 and the open state.
